# Supplementary material
Source: Hindawi journal article supplement (doi:10.1155/2011/154325)
Supplement: f1 [file 154325.f1.pdf]

## Supplement

Supplementary table 1: AD patients target genes of the module CTCF-EGRF-SP1F derived from biclustering analysis with eight clusters. The columns describe the Gene symbol, GeneID and the molecular function as described in Gene Ontology.

| Gene symbol | GeneID | Molecular function                                                                                                                                                                                                                                                                                                                                                            |
|-------------|--------|-------------------------------------------------------------------------------------------------------------------------------------------------------------------------------------------------------------------------------------------------------------------------------------------------------------------------------------------------------------------------------|
| AP3S1       | 1176   | protein binding, protein transporter activity, transporter activity                                                                                                                                                                                                                                                                                                           |
| BAI2        | 576    | G-protein coupled receptor activity, brain-specific angiogenesis inhibitor activity                                                                                                                                                                                                                                                                                           |
| C1orf95     | 375057 |                                                                                                                                                                                                                                                                                                                                                                               |
| C20orf24    | 55969  | molecular function, protein binding                                                                                                                                                                                                                                                                                                                                           |
| CD164       | 8763   | protein binding                                                                                                                                                                                                                                                                                                                                                               |
| EFNB2       | 1948   | ephrin receptor binding                                                                                                                                                                                                                                                                                                                                                       |
| EIF5        | 1983   | GTP binding, GTPase activity, nucleotide binding, translation factor activity, nucleic acid binding, translation initiation factor activity                                                                                                                                                                                                                                   |
| EPAS1       | 2034   | DNA binding, RNA polymerase II transcription factor activity, enhancer binding, histone acetyltransferase binding, protein binding, protein heterodimerization activity, contributes to sequence-specific DNA binding, signal transducer activity, specific RNA polymerase II transcription factor activity, transcription coactivator activity, transcription factor binding |
| GLUD1       | 2746   | ADP, ATP, GTP, NAD binding, glutamate dehydrogenase activity, glutamate dehydrogenase activity, identical protein binding, leucine binding, nucleotide binding, oxidoreductase activity, protein binding                                                                                                                                                                      |
| GNAS        | 2778   | GTP binding, GTPase activity, guanyl nucleotide binding, identical protein binding, molecular function, nucleotide binding, protein binding, signal transducer activity                                                                                                                                                                                                       |
| MCTP1       | 79772  | calcium ion binding, NOT calcium-dependent phospholipid binding                                                                                                                                                                                                                                                                                                               |
| NFIB        | 4781   | transcription factor activity                                                                                                                                                                                                                                                                                                                                                 |
| NPTX2       | 4885   | metal ion binding, molecular function, sugar binding                                                                                                                                                                                                                                                                                                                          |
| RB1CC1      | 9821   | protein binding                                                                                                                                                                                                                                                                                                                                                               |
| RHEB        | 6009   | GTP binding, GTPase activity, metal ion binding, nucleotide binding, protein binding                                                                                                                                                                                                                                                                                          |
| VAPA        | 9218   | protein binding, protein heterodimerization activity, signal transducer activity, structural molecule activity                                                                                                                                                                                                                                                                |

Supplementary table 2: Double transgenic mice target genes of the module CTCF-EGRF-SP1F derived from biclustering analysis with 13 clusters. The columns describe the Gene symbol, GeneID and the molecular function as described in Gene Ontology.

| Gene symbol | GeneID | Molecular function |
|-------------|--------|--------------------|
|-------------|--------|--------------------|

|          |        |                                                                                                                                                                                                                                                                                                    |
|----------|--------|----------------------------------------------------------------------------------------------------------------------------------------------------------------------------------------------------------------------------------------------------------------------------------------------------|
| Abi2     | 329165 |                                                                                                                                                                                                                                                                                                    |
| Bruno15  | 319586 | molecular function                                                                                                                                                                                                                                                                                 |
| Cacna2d1 | 12293  | calcium channel activity, ion channel activity, metal ion binding, protein binding, voltage-gated calcium channel activity, voltage-gated ion channel activity                                                                                                                                     |
| Ccdc47   | 67163  | calcium ion binding                                                                                                                                                                                                                                                                                |
| Dennd5a  | 19347  | Rab GTPase binding, protein binding                                                                                                                                                                                                                                                                |
| Eid1     | 58521  | protein binding, specific transcriptional repressor activity, transcription corepressor activity                                                                                                                                                                                                   |
| Eif5     | 217869 | GTP binding, binding, nucleotide binding, translation initiation factor activity                                                                                                                                                                                                                   |
| Gsk3b*)  | 56637  | ATP binding, beta-catenin binding, glycogen synthase kinase 3 activity, integrin binding, ionotropic glutamate receptor binding, kinase activity, nucleotide binding, p53 binding, protein binding, protein kinase activity, protein serine/threonine kinase activity, tau-protein kinase activity |
| Hnrnpk   | 15387  | DNA binding, RNA binding, nucleic acid binding, protein binding, single-stranded DNA binding                                                                                                                                                                                                       |
| Jmjd1c   | 108829 | metal ion binding, molecular function, oxidoreductase activity, acting on single donors with incorporation of molecular oxygen, incorporation of two atoms of oxygen                                                                                                                               |
| Klc1     | 16593  | binding, microtubule motor activity, motor activity, protein binding                                                                                                                                                                                                                               |
| Myh10    | 77579  | ADP, ATP binding, actin binding, actin filament binding, actin-dependent ATPase activity, calmodulin binding, microfilament motor activity, motor activity, nucleotide binding, protein binding                                                                                                    |
| Nfix     | 18032  | DNA binding, protein binding, transcription activator activity, transcription factor activity                                                                                                                                                                                                      |
| Nptxr    | 73340  | pentraxin receptor activity, protein complex binding                                                                                                                                                                                                                                               |
| Pafah1b1 | 18472  | dynein intermediate chain binding, hydrolase activity, microtubule binding, phosphoprotein binding, protein complex binding, protein homodimerization activity                                                                                                                                     |
| Pde10a   | 23984  | 3',5'-cyclic-GMP phosphodiesterase activity, 3',5'-cyclic-nucleotide phosphodiesterase activity, cAMP binding, catalytic activity, cyclic-nucleotide phosphodiesterase activity, drug binding, hydrolase activity, metal ion binding, nucleotide binding                                           |
| Pebp1    | 23980  | ATP binding, lipid binding, kinase binding, mitogen-activated protein kinase binding, nucleotide binding, peptidase inhibitor activity, protein kinase binding, receptor binding, serine-type endopeptidase inhibitor activity                                                                     |
| Ppp3cb   | 19056  | calcium-dependent protein serine/threonine phosphatase activity, calmodulin binding, hydrolase activity, metal ion binding, phosphoprotein phosphatase activity, protein heterodimerization activity, protein serine/threonine phosphatase activity                                                |
| Prei4    | 74182  | carbohydrate binding, catalytic activity, glycerophosphodiester phosphodiesterase activity, hydrolase activity, phosphoric diester hydrolase activity                                                                                                                                              |
| Ptbp2    | 56195  | RNA binding, mRNA binding, nucleic acid binding, nucleotide binding, protein binding                                                                                                                                                                                                               |
| Rab6     | 19346  | ATPase activator activity, GTP binding, nucleotide binding, protein N-terminus binding, protein binding                                                                                                                                                                                            |
| Reep5    | 13476  | protein binding, receptor activity                                                                                                                                                                                                                                                                 |
| Sgtb     | 218544 | Binding, protein heterodimerization activity, protein homodimerization activity                                                                                                                                                                                                                    |
| Syp      | 20977  | SH2 domain binding, identical protein binding, protein binding, protein complex binding, syntaxin-1 binding, transporter activity                                                                                                                                                                  |
| Tmed7    | 66676  | molecular function                                                                                                                                                                                                                                                                                 |
| Tsc22d1  | 21807  | transcription factor activity                                                                                                                                                                                                                                                                      |
| Tspan2   | 70747  | molecular function                                                                                                                                                                                                                                                                                 |
| Ttc7b    | 104718 | molecular function                                                                                                                                                                                                                                                                                 |
| Ubr3     | 68795  | ligase activity, metal ion binding, protein binding, ubiquitin-protein ligase activity, zinc ion                                                                                                                                                                                                   |

|                                     |       |                                                                                                                                                         |
|-------------------------------------|-------|---------------------------------------------------------------------------------------------------------------------------------------------------------|
|                                     |       | binding                                                                                                                                                 |
| Vamp2                               | 22318 | SNARE binding, calmodulin binding, myosin binding, phospholipid binding, protein binding, protein complex binding, syntaxin binding, syntaxin-1 binding |
| Vapa                                | 30960 | protein heterodimerization activity, structural molecule activity                                                                                       |
| Wdr6                                | 83669 | molecular function                                                                                                                                      |
| Ywhae                               | 22627 | enzyme binding, monooxygenase activity, protein binding, protein complex binding, protein domain specific binding                                       |
| Ywhaq                               | 22630 | monooxygenase activity, protein domain specific binding                                                                                                 |
| *) incorporated in AlzGene database |       |                                                                                                                                                         |

Supplementary table 3: LOAD patients target genes of the module CTCF-EGRF-SP1F derived from biclustering analysis with 18 clusters. The columns describe the Gene symbol, GeneID and the molecular function as described in Gene Ontology.

| Gene symbol                         | GeneID | Molecular function                                                                                                                                                                                                                                                                                                                                     |
|-------------------------------------|--------|--------------------------------------------------------------------------------------------------------------------------------------------------------------------------------------------------------------------------------------------------------------------------------------------------------------------------------------------------------|
| ATP1A3                              | 478    | ATP binding, ATPase activity, coupled to transmembrane movement of ions, phosphorylative mechanism, hydrolase activity, acting on acid anhydrides, catalyzing transmembrane movement of substances, metal ion binding, monovalent inorganic cation transmembrane transporter activity, nucleotide binding, sodium:potassium-exchanging ATPase activity |
| ATP6V1A                             | 523    | ATP binding, hydrogen ion transporting ATP synthase activity, rotational mechanism, hydrolase activity, acting on acid anhydrides, catalyzing transmembrane movement of substances, nucleotide binding, proton-transporting ATPase activity, rotational mechanism                                                                                      |
| CALY                                | 50632  | clathrin light chain binding, dopamine receptor binding                                                                                                                                                                                                                                                                                                |
| CCK                                 | 885    | hormone activity, neuropeptide hormone activity, protein binding                                                                                                                                                                                                                                                                                       |
| EEF1A2                              | 1917   | GTP binding, GTPase activity, nucleotide binding, protein binding, translation elongation factor activity, translation factor activity, nucleic acid binding                                                                                                                                                                                           |
| GARS                                | 2617   | ATP binding, glycine-tRNA ligase activity, nucleotide binding, protein dimerization activity                                                                                                                                                                                                                                                           |
| GOT1*)                              | 2805   | L-aspartate:2-oxoglutarate aminotransferase activity, carboxylic acid binding, phosphatidylserine decarboxylase activity, pyridoxal phosphate binding                                                                                                                                                                                                  |
| NAPB                                | 63908  | binding                                                                                                                                                                                                                                                                                                                                                |
| NELL2                               | 4753   | calcium ion binding, protein binding, structural molecule activity                                                                                                                                                                                                                                                                                     |
| PNMA2                               | 10687  | protein binding                                                                                                                                                                                                                                                                                                                                        |
| REEP5                               | 7905   | molecular function, protein binding                                                                                                                                                                                                                                                                                                                    |
| SYP                                 | 6855   | SH2 domain binding, calcium ion binding, cholesterol binding, identical protein binding, protein complex binding, syntaxin-1 binding, transporter activity                                                                                                                                                                                             |
| *) incorporated in AlzGene database |        |                                                                                                                                                                                                                                                                                                                                                        |

Supplementary table 4: AD patients target genes of the module CTCF-SP1F-ZBPF derived from biclustering analysis with five clusters. The columns describe the Gene symbol, GeneID and the molecular function as described in Gene Ontology.

| Gene symbol | GeneID | Molecular function                                                                                                                                                                                                                                                                                              |
|-------------|--------|-----------------------------------------------------------------------------------------------------------------------------------------------------------------------------------------------------------------------------------------------------------------------------------------------------------------|
| ADD3        | 120    | actin binding, calmodulin binding, metal ion binding, protein kinase C binding, structural constituent of cytoskeleton                                                                                                                                                                                          |
| CDC42EP4    | 23580  | GTP-Rho binding, protein binding                                                                                                                                                                                                                                                                                |
| CTBP2       | 1488   | NAD or NADH binding, cofactor binding, oxidoreductase activity, acting on the CH-OH group of donors, NAD or NADP as acceptor, protein binding, transcription repressor activity                                                                                                                                 |
| FXN         | 2395   | 2 iron, 2 sulfur cluster binding, ferric iron binding, ferrous iron binding, iron chaperone activity, iron-sulfur cluster binding, protein binding                                                                                                                                                              |
| MAFF        | 23764  | sequence-specific DNA binding, transcription factor activity                                                                                                                                                                                                                                                    |
| NBPF14      | 25832  |                                                                                                                                                                                                                                                                                                                 |
| PAX6        | 5080   | DNA binding, protein binding, sequence-specific DNA binding, transcription factor activity                                                                                                                                                                                                                      |
| RAB31       | 11031  | GTP binding, GTPase activity, nucleotide binding                                                                                                                                                                                                                                                                |
| RHOQ        | 23433  | GBD domain binding, GTP binding, GTPase activity, nucleotide binding, profilin binding, protein binding                                                                                                                                                                                                         |
| SEPT9       | 10801  | GTP binding, GTPase activity, nucleotide binding, protein binding                                                                                                                                                                                                                                               |
| SOX10       | 6663   | RNA polymerase II transcription factor activity, enhancer binding, chromatin binding, identical protein binding, promoter binding, protein binding, transcription coactivator activity                                                                                                                          |
| SUV420H1    | 51111  | histone methyltransferase activity (H4-K20 specific), methyltransferase activity, protein binding, transferase activity                                                                                                                                                                                         |
| TMEM184B    | 25829  |                                                                                                                                                                                                                                                                                                                 |
| ZBTB16      | 7704   | DNA binding, double-stranded DNA binding, identical protein binding, metal ion binding, protein C-terminus binding, protein binding, protein domain specific binding, protein homodimerization activity, specific transcriptional repressor activity, transcription factor/repressor activity, zinc ion binding |

Supplementary table 5: LOAD patients target genes of the module CTCF-SP1F-ZBPF derived from biclustering analysis with 18 clusters. The columns describe the Gene symbol, GeneID and the molecular function as described in Gene Ontology.

| Gene symbol | GeneID | Molecular function                                                                                                     |
|-------------|--------|------------------------------------------------------------------------------------------------------------------------|
| ADD3        | 120    | actin binding, calmodulin binding, metal ion binding, protein kinase C binding, structural constituent of cytoskeleton |
| ATG10       | 83734  | Atg12 ligase activity, ligase activity, protein binding                                                                |

|         |        |                                                                                                                                                                                                                                          |
|---------|--------|------------------------------------------------------------------------------------------------------------------------------------------------------------------------------------------------------------------------------------------|
| CXorf41 | 139212 |                                                                                                                                                                                                                                          |
| EEF1D   | 1936   | protein binding, signal transducer activity, translation elongation factor activity, translation factor activity, nucleic acid binding                                                                                                   |
| GLUL    | 2752   | ATP binding, glutamate decarboxylase activity, glutamate-ammonia ligase activity, identical protein binding, ligase activity, lyase activity, nucleotide binding                                                                         |
| MT3     | 4504   | antioxidant activity, copper ion binding, metal ion binding, zinc ion binding                                                                                                                                                            |
| NUCKS1  | 64710  |                                                                                                                                                                                                                                          |
| PIP4K2B | 8396   | 1-phosphatidylinositol-4-phosphate 5-kinase activity, 1-phosphatidylinositol-5-phosphate 4-kinase activity, ATP binding, kinase activity, nucleotide binding, protein binding, receptor signaling protein activity, transferase activity |
| RBX1    | 9978   | NEDD8 ligase activity, ligase activity, metal ion binding, protein binding, contributes to ubiquitin-protein ligase activity, zinc ion binding                                                                                           |
| RPL35   | 11224  | mRNA binding, protein binding, structural constituent of ribosome                                                                                                                                                                        |
| SHCBP1  | 79801  | SH2 domain binding, protein binding                                                                                                                                                                                                      |

Supplementary table 6: AD patients target genes of the module KLFS-SP1F-ZBPF derived from biclustering analysis with five clusters. The columns describe the Gene symbol, GeneID and the molecular function as described in Gene Ontology.

| Gene symbol | GeneID | Molecular function                                                                                                                                                                                       |
|-------------|--------|----------------------------------------------------------------------------------------------------------------------------------------------------------------------------------------------------------|
| ADD3        | 120    | actin binding, calmodulin binding, metal ion binding, protein kinase C binding, structural constituent of cytoskeleton                                                                                   |
| CDC42EP4    | 23580  | GTP-Rho binding, protein binding                                                                                                                                                                         |
| CLU*)       | 1191   | misfolded protein binding, protein binding                                                                                                                                                               |
| CTBP2       | 1488   | NAD or NADH binding, cofactor binding, oxidoreductase activity, oxidoreductase activity, acting on the CH-OH group of donors, NAD or NADP as acceptor, protein binding, transcription repressor activity |
| FXN         | 2395   | 2 iron, 2 sulfur cluster binding, ferric iron binding, ferrous iron binding, iron chaperone activity, iron-sulfur cluster binding, protein binding                                                       |
| NFE2L1      | 4779   | protein dimerization activity, sequence-specific DNA binding, transcription cofactor activity, transcription factor activity                                                                             |
| NUCKS1      | 64710  |                                                                                                                                                                                                          |
| PAX6        | 5080   | DNA binding, protein binding, sequence-specific DNA binding, transcription factor activity                                                                                                               |
| RAB31       | 11031  | GTP binding, GTPase activity, nucleotide binding                                                                                                                                                         |
| RHOQ        | 23433  | GBD domain binding, GTP binding, GTPase activity, nucleotide binding, profilin binding, protein binding                                                                                                  |
| SEPT9       | 10801  | GTP binding, GTPase activity, nucleotide binding, protein binding                                                                                                                                        |

|          |       |                                                                                                                                                                                                                                                                                                                 |
|----------|-------|-----------------------------------------------------------------------------------------------------------------------------------------------------------------------------------------------------------------------------------------------------------------------------------------------------------------|
| STOM     | 2040  | protein binding                                                                                                                                                                                                                                                                                                 |
| SUV420H1 | 51111 | histone methyltransferase activity (H4-K20 specific), methyltransferase activity, protein binding, transferase activity                                                                                                                                                                                         |
| TRAM1    | 23471 | protein binding, receptor activity                                                                                                                                                                                                                                                                              |
| WNK1     | 65125 | ATP binding, molecular function, nucleotide binding, protein binding, protein kinase inhibitor activity, protein serine/threonine kinase activity, transferase activity                                                                                                                                         |
| ZBTB16   | 7704  | DNA binding, double-stranded DNA binding, identical protein binding, metal ion binding, protein C-terminus binding, protein binding, protein domain specific binding, protein homodimerization activity, specific transcriptional repressor activity, transcription factor/repressor activity, zinc ion binding |

\*) incorporated in AlzGene database

Supplementary table 7: LOAD patients target genes of the module KLFS-SP1F-ZBPF derived from biclustering analysis with 18 clusters. The columns describe the Gene symbol, GeneID and the molecular function as described in Gene Ontology.

| Gene symbol | GeneID | Molecular function                                                                                                                                                                                                                       |
|-------------|--------|------------------------------------------------------------------------------------------------------------------------------------------------------------------------------------------------------------------------------------------|
| ADD3        | 120    | actin binding, calmodulin binding, metal ion binding, protein kinase C binding, structural constituent of cytoskeleton                                                                                                                   |
| ATG10       | 83734  | Atg12 ligase activity, ligase activity, protein binding                                                                                                                                                                                  |
| CKB         | 1152   | ATP binding, creatine kinase activity, nucleotide binding, protein binding                                                                                                                                                               |
| CLU*)       | 1191   | misfolded protein binding, protein binding                                                                                                                                                                                               |
| CXorf41     | 139212 |                                                                                                                                                                                                                                          |
| EEF1D       | 1936   | protein binding, signal transducer activity, translation elongation factor activity, translation factor activity, nucleic acid binding                                                                                                   |
| GLUL        | 2752   | ATP binding, glutamate decarboxylase activity, glutamate-ammonia ligase activity, identical protein binding, ligase activity, lyase activity, nucleotide binding                                                                         |
| NUCKS1      | 64710  |                                                                                                                                                                                                                                          |
| PIP4K2B     | 8396   | 1-phosphatidylinositol-4-phosphate 5-kinase activity, 1-phosphatidylinositol-5-phosphate 4-kinase activity, ATP binding, kinase activity, nucleotide binding, protein binding, receptor signaling protein activity, transferase activity |
| RPL35       | 11224  | mRNA binding, protein binding, structural constituent of ribosome                                                                                                                                                                        |
| SHCBP1      | 79801  | SH2 domain binding, protein binding                                                                                                                                                                                                      |

\*) incorporated in AlzGene database

Supplementary table 8: Double transgenic mice target genes of the module CTCF-SP1F-ZBPF derived from biclustering analysis with 13 clusters. The columns describe the Gene symbol, GeneID and the molecular function as described in Gene Ontology.

| Gene symbol            | GeneID | Molecular function                                                                                                                                                                                                                                                                                                                                |
|------------------------|--------|---------------------------------------------------------------------------------------------------------------------------------------------------------------------------------------------------------------------------------------------------------------------------------------------------------------------------------------------------|
| 1500012F01Rik          | 68949  |                                                                                                                                                                                                                                                                                                                                                   |
| Acs1l                  | 14081  | ATP binding, acetate-CoA ligase (ADP-forming) activity, catalytic activity, ligase activity, long-chain fatty acid-CoA ligase activity, nucleotide binding                                                                                                                                                                                        |
| Actr10                 | 56444  | protein binding                                                                                                                                                                                                                                                                                                                                   |
| Add1                   | 11518  | T cell receptor binding, actin binding, calmodulin binding, metal ion binding, structural molecule activity                                                                                                                                                                                                                                       |
| Adss                   | 11566  | GTP binding, adenylosuccinate synthase activity, ligase activity, magnesium ion binding, metal ion binding, nucleotide binding                                                                                                                                                                                                                    |
| Atp11b                 | 76295  | ATP binding, hydrolase activity, molecular function, nucleotide binding                                                                                                                                                                                                                                                                           |
| Atp8b2                 | 54667  | ATP binding, ATPase activity, coupled to transmembrane movement of ions, phosphorylative mechanism, hydrolase activity, hydrolase activity, acting on acid anhydrides, catalyzing transmembrane movement of substances, magnesium ion binding, metal ion binding, nucleotide binding, phospholipid-translocating ATPase activity, protein binding |
| BC018507               | 218333 | molecular function                                                                                                                                                                                                                                                                                                                                |
| Brsk2                  | 75770  | ATP binding, kinase activity, magnesium ion binding, metal ion binding, nucleotide binding, protein kinase activity, protein serine/threonine kinase activity, transferase activity                                                                                                                                                               |
| Bzw1                   | 66882  | binding, molecular function                                                                                                                                                                                                                                                                                                                       |
| Ccl27a                 | 20301  | Cytokine activity, protein binding                                                                                                                                                                                                                                                                                                                |
| Cdc42                  | 12540  | GTP-dependent protein binding, GTPase activity, mitogen-activated protein kinase kinase binding, nucleotide binding, protein binding                                                                                                                                                                                                              |
| Cdc42se2               | 72729  | molecular function                                                                                                                                                                                                                                                                                                                                |
| Col25a1 <sup>*</sup> ) | 77018  | molecular function                                                                                                                                                                                                                                                                                                                                |
| Ctnna2                 | 12386  | Cadherin binding, structural molecule activity                                                                                                                                                                                                                                                                                                    |
| D10Ert610e             | 52666  | Rho guanyl-nucleotide exchange factor activity, guanyl-nucleotide exchange factor activity, protein binding                                                                                                                                                                                                                                       |
| D1Ert622e              | 52392  | molecular function                                                                                                                                                                                                                                                                                                                                |
| Dlat                   | 235339 | acyltransferase activity, dihydrolipoyllysine-residue acetyltransferase activity, lipoic acid binding, protein binding, transferase activity                                                                                                                                                                                                      |
| Dnpep                  | 13437  | aminopeptidase activity, hydrolase activity, metal ion binding, metallopeptidase activity, peptidase activity, zinc ion binding                                                                                                                                                                                                                   |
| Dpysl4                 | 26757  | hydrolase activity, acting on carbon-nitrogen (but not peptide) bonds, protein binding                                                                                                                                                                                                                                                            |
| Eif1ay                 | 66235  | RNA binding, molecular function, translation initiation factor activity                                                                                                                                                                                                                                                                           |
| Epb4.111               | 13821  | actin binding, binding, cytoskeletal protein binding, protein binding, structural molecule activity                                                                                                                                                                                                                                               |
| Fam135a                | 68187  | molecular function                                                                                                                                                                                                                                                                                                                                |
| Fam169a                | 320557 | molecular function                                                                                                                                                                                                                                                                                                                                |

|         |        |                                                                                                                                                                                                                                                                                                                                                                                               |
|---------|--------|-----------------------------------------------------------------------------------------------------------------------------------------------------------------------------------------------------------------------------------------------------------------------------------------------------------------------------------------------------------------------------------------------|
| Fam49b  | 223601 | molecular function                                                                                                                                                                                                                                                                                                                                                                            |
| Fbxo3   | 57443  |                                                                                                                                                                                                                                                                                                                                                                                               |
| Fkrp    | 243853 | Transferase activity                                                                                                                                                                                                                                                                                                                                                                          |
| Fnbp1   | 14269  | Lipid binding, protein binding                                                                                                                                                                                                                                                                                                                                                                |
| Foxj3   | 230700 | DNA binding, sequence-specific DNA binding, transcription factor activity                                                                                                                                                                                                                                                                                                                     |
| Fry     | 320365 | molecular function                                                                                                                                                                                                                                                                                                                                                                            |
| Gabra4  | 14397  | GABA-A receptor activity, chloride channel activity, extracellular ligand-gated ion channel activity, ion channel activity, receptor activity                                                                                                                                                                                                                                                 |
| Gabrb3  | 14402  | GABA-A receptor activity, chloride channel activity, extracellular ligand-gated ion channel activity, ion channel activity, receptor activity                                                                                                                                                                                                                                                 |
| Gria2   | 14800  | PDZ domain binding, extracellular-glutamate-gated ion channel activity, ion channel activity, ionotropic glutamate receptor activity, protein binding, protein kinase binding, receptor activity                                                                                                                                                                                              |
| Hdgfrp3 | 29877  | chromatin binding, growth factor activity                                                                                                                                                                                                                                                                                                                                                     |
| Hnrnpu  | 51810  | ATP, DNA, RNA binding, nucleic acid binding, nucleotide binding, protein binding                                                                                                                                                                                                                                                                                                              |
| Hspa12a | 73442  | ATP binding, molecular function, nucleotide binding                                                                                                                                                                                                                                                                                                                                           |
| Il33*)  | 77125  | Cytokine activity                                                                                                                                                                                                                                                                                                                                                                             |
| Khdrbs1 | 20218  | RNA binding, SH3 domain binding, SH3/SH2 adaptor activity, protein binding, transcription repressor activity                                                                                                                                                                                                                                                                                  |
| Kndc1   | 76484  | Ras guanyl-nucleotide exchange factor activity, guanyl-nucleotide exchange factor activity, kinase activity, protein binding, protein serine/threonine kinase activity                                                                                                                                                                                                                        |
| Larp5   | 217980 | RNA binding, molecular function, nucleic acid binding                                                                                                                                                                                                                                                                                                                                         |
| Map2k4  | 26398  | ATP binding, JUN kinase kinase activity, MAP kinase kinase activity, kinase activity, mitogen-activated protein kinase kinase kinase binding, nucleotide binding, protein kinase activity, protein serine/threonine kinase activity, protein tyrosine kinase activity, transferase activity                                                                                                   |
| Mapk1   | 26413  | ATP binding, MAP kinase 2 activity, RNA polymerase II carboxy-terminal domain kinase activity, kinase activity, mitogen-activated protein kinase kinase kinase binding, nucleotide binding, phosphotyrosine binding, protein binding, protein kinase activity, protein serine/threonine kinase activity, transcription factor binding, transcription regulator activity, transferase activity |
| Mapk9   | 26420  | ATP binding, JUN kinase activity, MAP kinase activity, caspase activator activity, kinase activity, mitogen-activated protein kinase kinase kinase binding, nucleotide binding, protein binding, protein kinase activity, protein serine/threonine kinase activity, transferase activity                                                                                                      |
| March7  | 57438  | ligase activity, metal ion binding, molecular function, zinc ion binding                                                                                                                                                                                                                                                                                                                      |
| Mll5    | 69188  | histone-lysine N-methyltransferase activity, metal ion binding, methyltransferase activity, protein binding, transferase activity, zinc ion binding                                                                                                                                                                                                                                           |
| Mtap4   | 17758  |                                                                                                                                                                                                                                                                                                                                                                                               |
| Nap111  | 53605  | protein binding                                                                                                                                                                                                                                                                                                                                                                               |
| Nr2f1   | 13865  | DNA binding, ligand-dependent nuclear receptor activity, metal ion binding, receptor activity, sequence-specific DNA binding, steroid hormone receptor activity, transcription activator activity, transcription factor activity, zinc ion binding                                                                                                                                            |
| Ola1    | 67059  | ATP binding, GTP binding, hydrolase activity, molecular function, nucleotide binding                                                                                                                                                                                                                                                                                                          |
| Pcmt1   | 18537  | S-adenosylmethionine-dependent methyltransferase activity, methyltransferase                                                                                                                                                                                                                                                                                                                  |



|                     |        |                                                                                                                                                                                                                         |
|---------------------|--------|-------------------------------------------------------------------------------------------------------------------------------------------------------------------------------------------------------------------------|
|                     |        | activity, protein binding, protein-L-isoaspartate (D-aspartate) O-methyltransferase activity, transferase activity                                                                                                      |
| Pcsk2               | 18549  | endopeptidase activity, hydrolase activity, peptidase activity, protein complex binding, serine-type endopeptidase activity                                                                                             |
| Pfn1                | 18643  | Rho GTPase binding, actin binding, phosphatidylinositol-4,5-bisphosphate binding, protein binding, receptor binding                                                                                                     |
| Polr1d              | 20018  | Protein binding                                                                                                                                                                                                         |
| Ppm1a               | 19042  | catalytic activity, hydrolase activity, magnesium ion binding, manganese ion binding, metal ion binding, phosphoprotein phosphatase activity, protein C-terminus binding, protein serine/threonine phosphatase activity |
| Prpf39              | 328110 | Binding, molecular function                                                                                                                                                                                             |
| Psma7               | 26444  | endopeptidase activity, hydrolase activity, peptidase activity, threonine-type endopeptidase activity                                                                                                                   |
| Ptptra              | 19262  | hydrolase activity, phosphatase activity, phosphoprotein phosphatase activity, protein complex binding, protein tyrosine phosphatase activity, receptor activity                                                        |
| Ptprz1              | 19283  | hydrolase activity, phosphoprotein phosphatase activity, protein binding, receptor activity                                                                                                                             |
| Rasgef1b            | 320292 | guanyl-nucleotide exchange factor activity, molecular function                                                                                                                                                          |
| Rnf115              | 67845  | ligase activity, metal ion binding, protein binding, zinc ion binding                                                                                                                                                   |
| Rundc3b             | 242819 | molecular function                                                                                                                                                                                                      |
| Sesn3               | 75747  | molecular function                                                                                                                                                                                                      |
| Slc23a2             | 54338  | L-ascorbate:sodium symporter activity, L-ascorbic acid transporter activity, symporter activity, transporter activity                                                                                                   |
| Srrm1               | 51796  | DNA binding, RNA binding, NOT RNA binding                                                                                                                                                                               |
| Ssx2ip              | 99167  | actinin binding, protein binding                                                                                                                                                                                        |
| Tanc2 <sup>*)</sup> | 77097  | binding, molecular function                                                                                                                                                                                             |
| Tlk1                | 228012 | ATP binding, kinase activity, molecular function, nucleotide binding, protein kinase activity, protein serine/threonine kinase activity, transferase activity                                                           |
| Tm7sf3              | 67623  | molecular function                                                                                                                                                                                                      |
| Trim3               | 55992  | Metal ion binding, protein binding, zinc ion binding                                                                                                                                                                    |
| Ttll1               | 319953 | ligase activity, molecular function, tubulin-tyrosine ligase activity                                                                                                                                                   |
| Txndc14             | 66958  | molecular function                                                                                                                                                                                                      |
| Ube2e2              | 218793 | ATP binding, ligase activity, molecular function, nucleotide binding, small conjugating protein ligase activity, ubiquitin-protein ligase activity                                                                      |
| Zbtb4               | 75580  | metal ion binding, molecular function                                                                                                                                                                                   |
| Zc3h14              | 75553  | molecular function                                                                                                                                                                                                      |

<sup>\*)</sup> incorporated in AlzGene database

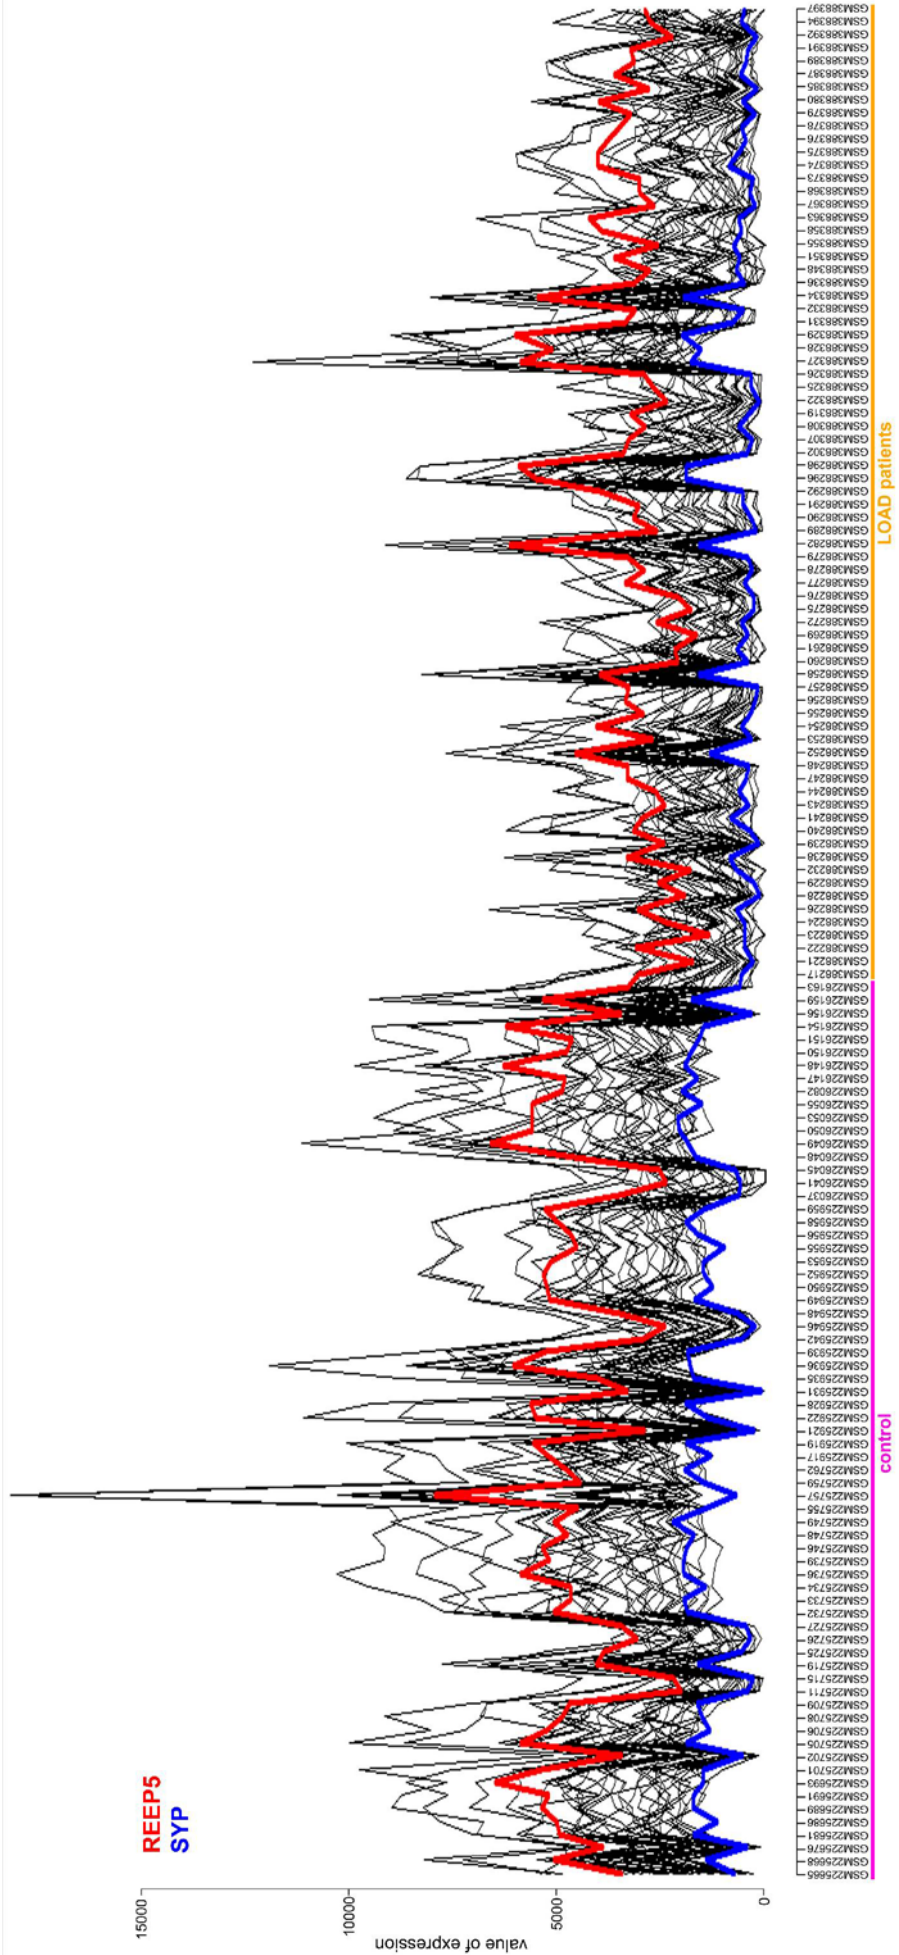

Supplementary figure 1: Expression profile of one cluster of coregulated genes from the GSE15222 dataset (LOAD patients dataset). On the x-axis the sample IDs (specified by accession numbers of GEO/NCBI) incorporated in the cluster are given and y-axis indicates values of expression. One gene corresponds to a single line in the profile and the target genes of the module as mentioned in the text are coloured. The target genes of the profile were used to establish the module CTCF-EGFR-SP1F.
